# Supplementary material for: Pre-diagnosis plasma immune markers and risk of non-Hodgkin lymphoma in two prospective cohort studies
Source: PubMed Central journal article supplement — Haematologica. 2018 Jun 21;103(10):1679–87. doi: 10.3324/haematol.2017.183236 (PMC6165815; doi:10.3324/haematol.2017.183236), 2018-10
Supplement: 2017.183236.EPSTEIN_SUPPL.pdf [file 2017.183236.EPSTEIN_SUPPL.pdf]

## Pre-diagnosis plasma immune markers and risk of non-Hodgkin lymphoma in two prospective cohort studies

Mara M. Epstein,<sup>1</sup> Bernard Rosner,<sup>2,3</sup> Elizabeth C. Breen,<sup>4,5</sup> Julie L. Batista,<sup>3</sup> Edward L. Giovannucci,<sup>3,6,7</sup> Larry Magpantay,<sup>4,8</sup> Jon C. Aster,<sup>9</sup> Scott J. Rodig,<sup>9</sup> Kimberly A. Bertrand,<sup>10</sup> Francine Laden,<sup>3,7</sup> Otoniel Martínez-Maza<sup>4,8,11,12,13</sup> and Brenda M. Birmann<sup>3</sup>

<sup>1</sup>Department of Medicine and the Meyers Primary Care Institute, University of Massachusetts Medical School, Worcester, MA; <sup>2</sup>Department of Biostatistics, Harvard T.H. Chan School of Public Health, Boston, MA; <sup>3</sup>Channing Division of Network Medicine, Department of Medicine, Brigham and Women's Hospital and Harvard Medical School, Boston, MA; <sup>4</sup>UCLA AIDS Institute, Los Angeles, CA; <sup>5</sup>Department of Psychiatry & Biobehavioral Sciences, David Geffen School of Medicine at UCLA, Los Angeles, CA; <sup>6</sup>Department of Nutrition, Harvard T.H. Chan School of Public Health, Boston, MA; <sup>7</sup>Department of Epidemiology, Harvard T.H. Chan School of Public Health, Boston, MA; <sup>8</sup>Department of Obstetrics & Gynecology, David Geffen School of Medicine at UCLA, Los Angeles, CA; <sup>9</sup>Department of Pathology, Brigham and Women's Hospital and Harvard Medical School, Boston, MA; <sup>10</sup>Slone Epidemiology Center at Boston University, Boston, MA; <sup>11</sup>Department of Epidemiology, UCLA Fielding School of Public Health, Los Angeles, CA; <sup>12</sup>Department of Microbiology, Immunology & Molecular Genetics, David Geffen School of Medicine at UCLA, Los Angeles, CA and <sup>13</sup>Jonsson Comprehensive Cancer Center, David Geffen School of Medicine at UCLA, Los Angeles, CA, USA

©2018 Ferrata Storti Foundation. This is an open-access paper. doi:10.3324/haematol.2017.183236

Received: November 7, 2017.

Accepted: June 15, 2018.

Pre-published: June 21, 2018.

Correspondence: [brenda.birmann@channing.harvard.edu](mailto:brenda.birmann@channing.harvard.edu)

---

## **Supplementary Materials**

Epstein et al., Pre-diagnosis plasma immune markers and risk of non-Hodgkin lymphoma in two prospective cohort studies

This supplementary file includes:

Supplementary Methods

Supplementary Tables 1-8

## Supplementary Methods

### *Study Population*

The Nurses' Health Study (NHS) was established in 1976 when 121 700 female nurses aged 30-55 from 11 US states responded to a mailed questionnaire.<sup>1</sup> The Health Professionals Follow-up Study (HPFS) was initiated in 1986 among 51 529 male US health professionals aged 40-75 at baseline. In 1989-90, 32 826 NHS participants contributed blood samples by methods described in detail elsewhere.<sup>2</sup> Between 1993 and 1994, 18 018 men contributed blood samples via similar methods and protocols as for the NHS. Briefly, cohort members received phlebotomy kits, had blood drawn locally, then returned the samples via overnight courier. Upon arrival, samples were centrifuged, aliquotted and stored at -130°C.<sup>2</sup>

Participants from both studies complete biennial questionnaires to update exposures and ascertain new disease diagnoses. Participant deaths are ascertained by next-of-kin, the postal service or routine searches of the National Death Index.<sup>3,4</sup> Cancer diagnoses identified by self-report or via death follow-up are confirmed by medical record review with participant consent, or by linkage to tumor registries. Follow-up for NHS and HPFS participants submitting a blood sample has consistently been >99% in each cohort.

Informed consent to participate in the cohorts was implied by return of study questionnaires; cohort members who contributed blood samples provided written informed consent at the time of specimen collection. The present study was conducted in accordance with the Declaration of Helsinki and approved by the Institutional Review Boards of the Brigham and Women's Hospital and Harvard T.H. Chan School of Public Health.

### *Case and Control Selection*

Among cohort members with archived blood samples we included all with confirmed incident non-Hodgkin lymphoma (NHL) diagnosed at least three months after date of blood draw and prior to December 31, 2010, with no history of other cancer (except non-melanoma skin cancer). NHL histologic subtype was classified as described previously<sup>5</sup> and according to the World Health Organization classification for hematopoietic tumors by study pathologists (JCA, SJR).<sup>6,7</sup> Subtypes were categorized for analysis according to guidelines from the International Lymphoma Epidemiology (InterLymph) Consortium.<sup>8,9</sup> Several major B-cell NHL subtypes were analyzed individually, including diffuse large B-cell lymphoma (DLBCL), follicular lymphoma (FL), and chronic lymphocytic leukemia/small lymphocytic lymphoma (CLL/SLL). Other identified, less common subtypes of B-NHL were combined into an "other B-NHL" category. We categorized all T-cell NHLs (T-NHL) together and also defined a category of all B-NHL cases. Confirmed cases that could not be further classified were omitted from subtype-specific analyses.

For each eligible NHL case, we matched one control with an archived blood sample and no history of cancer (other than non-melanoma skin cancer) as of the case's diagnosis date. Matching factors included cohort/sex, age ( $\pm 1$  year), race/ethnicity (Caucasian, other), fasting

status at blood draw ( $\geq 8$  hours or not), date of blood draw ( $\pm 1$  month), and time of day of blood draw (within 2-hour increments).

### *Biomarker Assessment*

At most, samples had undergone two freeze-thaw cycles prior to immune marker testing. Assays were performed at the University of California, Los Angeles (LM, OMM), using multiplexed assay kits (Fluorokine® MAP, R & D Systems, Minneapolis, MN) according to manufacturer directions, and a Bio-Plex 200 Luminex instrument and Bio-Plex analysis software (Bio-Rad, Hercules, CA). Assay panel A (first panel from the Soluble Receptor Human Panel Multiplex Kit) included sCD30, sIL-2R $\alpha$  (also known as sCD25), B-cell activating factor of the TNF family (BAFF, a B-cell stimulatory cytokine also known as B lymphocyte stimulator, BLyS) and CXCL13 (also known as B lymphocyte chemoattractant, BLC, or B cell-attracting chemokine 1, BCA-1). Panel B (also from the Soluble Receptor kit) comprised four soluble receptors [soluble CD14 (sCD14), soluble GP130 (sGP130), soluble IL-6 receptor (sIL-6R $\alpha$ ) and sTNF-R2] and C-reactive protein (CRP). Panel C (from the High Sensitivity Human Inflammation Multiplex Kit) included IL-6, IL-8, IL-10, and TNF- $\alpha$ . Specimens from matched cases and controls were handled in the same batches, with pairs of quality control (QC) specimens interspersed randomly in each batch (approximately 10% of samples) to monitor assay performance. Laboratory personnel were blinded to case/control status and the identity of QC specimens.

The overall coefficients of variation (CV) for the immune markers ranged from 3.9% (BAFF) to 14.3% (IL-6); for the three immune markers with overall CVs  $>10\%$  (IL-6, IL-10, and TNF- $\alpha$ ), within-batch CVs were all  $<8\%$ .

For each plate of samples tested for a given analyte, a biomarker- and plate-specific lower limit of detection (LLD) was defined. Observations below the LLD were assigned a value of one-half the plate-specific LLD for that marker. In addition, extrapolated values  $\leq 0.1$  pg/mL were considered unreliable and were similarly assigned a value of one-half the plate-specific LLD for that marker.<sup>10, 11</sup> Biomarkers with recoded values include CRP (N=11), IL-10 (N=193), IL-6 (N=21), and IL-8 (N=5). All analyte concentrations were natural log-transformed to improve normality.

Prior to testing study samples we performed pilot studies to ensure that the pre-processing delays inherent in our blood collection protocols did not compromise biomarker reliability.<sup>2</sup> For all but three analytes, intraclass correlation coefficients (ICC) calculated from samples with 0-, 24- and 48-hour delays indicated good to excellent reproducibility (all ICCs  $\geq 0.55$ , with most  $\geq 0.80$ ) across the time frame in which the study samples were returned for processing. However, for TNF- $\alpha$ , IL-8 and CXCL13, the reproducibility in samples processed  $>24$  hours after blood draw was poor; thus, in analyses of those three markers we set values to missing for the samples with  $>24$  hour processing delays (NHS: N= 35; HPFS: N=23). We<sup>10</sup> and others<sup>12-14</sup> have previously demonstrated acceptable to excellent within-person temporal stability over a period of up to two years for most biomarkers in the present analysis. Because measured concentrations of biomarkers were similar between cohorts (**Supplementary Table 1**), we

pooled data from the NHS and HPFS to maximize statistical power for subtype-specific and stratified analyses.

### *Statistical Methods*

We implemented the batch calibration methods of Rosner et al. to diminish the potential influence of laboratory batch-related variability on biomarker-NHL associations.<sup>15</sup> Briefly, for each analyte we calculated a “batch effect correction factor” using linear regression models run on natural log-transformed biomarker values and then utilized the batch-specific correction factors to normalize the measured laboratory values across batches.

Outlying immune marker values were identified using the Rosner extreme Studentized deviate method.<sup>16</sup> Records with implausible outlier values were omitted only from analyses of the given marker. We calculated partial Spearman correlation coefficients among the pooled controls with adjustment for age at blood draw and cohort to assess the pairwise correlations between the immune markers.

The primary analysis assessed batch effect-corrected, log-transformed values of each immune marker continuously per standard deviation (SD) increase in concentration based on SD units calculated for the log-transformed variables in the pooled study controls. To permit inclusion of all the controls in subtype-specific analyses, we used unconditional logistic regression models to calculate odds ratios (OR) and 95% confidence intervals (CI) for the association between each immune marker and NHL risk, overall and by major histologic subtype (DLBCL, FL, CLL/SLL, other B-NHL, all B-NHL, all T-NHL). Most models adjusted for all the matching factors; we could not adjust for race in models for T-NHL and certain subgroup analyses due to small numbers. We evaluated additional potential confounding variables, including body mass index at blood draw (<22.5, 22.5-24.9, 25.0-29.9,  $\geq 30$  kg/m<sup>2</sup>) and in young adulthood (<18.5, 18.5-22.4, 22.5-24.9,  $\geq 25$  kg/m<sup>2</sup>) and self-reported history of autoimmune disease (rheumatoid arthritis, ulcerative colitis/Crohn disease, multiple sclerosis, psoriasis, and Sjögren syndrome). However, the addition of these variables to the multivariable model did not meaningfully change the reported associations, and thus only matching factors were retained in the final models. Exclusion of individuals with a history of autoimmune disease also did not influence the observed associations.

Additional analyses explored associations between NHL risk and multiple immune markers. Our *a priori* approach to identifying multi-marker profiles consisted of mutual adjustment of markers that were individually associated with NHL risk (sTNF-R2, sIL-2R $\alpha$ , CXCL13, sCD30, BAFF), with further adjustment for matching factors. We investigated these 5-marker models for risk of all NHL and each major NHL subtype. For comparison we decided *post hoc* to explore multivariable, multi-marker models constructed using the automated stepwise regression procedure, with the matching factors forced in and the significance level set to  $p=0.10$ , as well as a multivariable model mutually adjusted for all 13 immune markers.

We also examined models stratified by the time interval between blood draw and diagnosis (0 to <5, 5 to <10, and  $\geq 10$  years) to explore whether any immune biomarker

associations suggested only earlier or later influence on NHL pathogenesis. We assessed heterogeneity in associations by time period using the contrast test method.<sup>17</sup>

Secondary analyses that we added *post hoc* included an examination of possible non-linear relationships between NHL risk and immune markers, which we assessed non-parametrically with restricted cubic splines,<sup>18</sup> looking at risk of all NHL, B-NHL, T-NHL, and the four histologic subtypes of B-NHL (DLBCL, FL, CLL/SLL, other B-NHL). The unconditional logistic regression models included the five immune markers from the main multi-marker models (sTNFR2, sIL2-R $\alpha$ , CXCL13, sCD30, BAFF), and were additionally adjusted for age at blood draw, time of blood draw, cohort and race.

In another *post hoc* exploratory analysis to compare with unconditional logistic regression, we utilized polytomous logistic regression (PLR) to better account for potential heterogeneity between strata, looking at all B-NHL and all T-NHL in one model, and the four histologic subtypes of B-NHL noted previously in a second model. Models examined the association between NHL and the same five immune markers (sTNF-R2, sIL-2R $\alpha$ , CXCL13, sCD30, BAFF) as in the unconditional logistic regression multi-marker models for the total time period, and then stratified by time between blood draw and diagnosis/index date (0 to <5, 5 to <10, and  $\geq$ 10 years). We created a semi-continuous variable with three levels, taking the value of the median of each time period, and constructed an interaction term between this variable and levels of each of the five main biomarkers (per-SD, natural log scale), which we included with the corresponding main effect terms to assess heterogeneity of the biomarker-endpoint associations across time periods. The PLR models were adjusted for age at blood draw (continuous), cohort, and time of blood draw (continuous). We could not adjust the PLR models for race due to small numbers in certain categories (T-NHL and earliest time period).

## References cited in the Supplementary Methods

1. Colditz GA, Hankinson SE. The Nurses' Health Study: lifestyle and health among women. *Nat Rev Cancer*. 2005;5(5):388-396.
2. Hankinson SE, Willett WC, Manson JE, et al. Alcohol, height, and adiposity in relation to estrogen and prolactin levels in postmenopausal women. *J Natl Cancer Inst*. 1995;87(17):1297-1302.
3. Rich-Edwards JW, Corsano KA, Stampfer MJ. Test of the National Death Index and Equifax Nationwide Death Search. *Am J Epidemiol*. 1994;140(11):1016-1019.
4. Stampfer MJ, Willett WC, Speizer FE, et al. Test of the National Death Index. *Am J Epidemiol*. 1984;119(5):837-839.
5. Bertrand KA, Giovannucci E, Zhang SM, Laden F, Rosner B, Birmann BM. A prospective analysis of body size during childhood, adolescence, and adulthood and risk of non-Hodgkin lymphoma. *Cancer Prev Res (Phila)*. 2013;6(8):864-873.
6. Swerdlow SH, Campo E, Harris NL, et al. WHO Classification of Tumours of Haematopoietic and Lymphoid Tissues. Lyon, France: IARC Press, 2008.
7. Jaffe ES, Harris NL, Stein H, Vardiman JW. Pathology and Genetics of Tumours of Haematopoietic and Lymphoid Tissues. WHO/IARC Classification of Tumours, 3rd Edition, Volume 3. Lyon: International Agency for Research on Cancer, 2001.

8. Morton LM, Turner JJ, Cerhan JR, et al. Proposed classification of lymphoid neoplasms for epidemiologic research from the Pathology Working Group of the International Lymphoma Epidemiology Consortium (InterLymph). *Blood*. 2007;110(2):695-708.
9. Turner JJ, Morton LM, Linet MS, et al. InterLymph hierarchical classification of lymphoid neoplasms for epidemiologic research based on the WHO classification (2008): update and future directions. *Blood*. 2010;116(20):e90-98.
10. Epstein MM, Breen EC, Magpantay L, et al. Temporal stability of serum concentrations of cytokines and soluble receptors measured across two years in low-risk HIV-seronegative men. *Cancer Epidemiol Biomarkers Prev*. 2013;22(11):2009-2015.
11. Breen EC, Reynolds SM, Cox C, et al. Multisite comparison of high-sensitivity multiplex cytokine assays. *Clin Vaccine Immunol*. 2011;18(8):1229-1242.
12. Gu Y, Zeleniuch-Jacquotte A, Linkov F, et al. Reproducibility of serum cytokines and growth factors. *Cytokine*. 2009;45(1):44-49.
13. Hofmann JN, Yu K, Bagni RK, Lan Q, Rothman N, Purdue MP. Intra-individual variability over time in serum cytokine levels among participants in the prostate, lung, colorectal, and ovarian cancer screening Trial. *Cytokine*. 2011;56(2):145-148.
14. Hardikar S, Song X, Kratz M, et al. Intraindividual variability over time in plasma biomarkers of inflammation and effects of long-term storage. *Cancer Causes Control*. 2014;25(8):969-976.
15. Rosner B, Cook N, Portman R, Daniels S, Falkner B. Determination of blood pressure percentiles in normal-weight children: some methodological issues. *Am J Epidemiol*. 2008;167(6):653-666.
16. Rosner B. Percentage Points for a Generalized ESD Many-Outlier Procedure. *Technometrics*. 1983;25(2):165-172.
17. Wang M, Spiegelman D, Kuchiba A, et al. Statistical methods for studying disease subtype heterogeneity. *Stat Med*. 2016;35(5):782-800.
18. Durrleman S, Simon R. Flexible regression models with cubic splines. *Stat Med*. 1989;8(5):551-561.

## Supplementary Tables 1-8

**Supplementary Table 1.** Description of immune markers by cohort (pg/mL)

**Supplementary Table 2.** Pairwise Spearman correlation coefficients between immune markers among controls only, adjusted for age and cohort (sex)

**Supplementary Table 3.** Associations of individual pre-diagnosis plasma immune markers with NHL risk, overall and by major histologic subtype, separately for the Nurses' Health Study (NHS) and the Health Professionals Follow-up Study (HPFS) participants

**Supplementary Table 4.** Independent associations of multiple pre-diagnosis plasma immune markers with risk of NHL, overall and by B or T cell type of origin, for the complete follow-up period and stratified by years of follow-up, using polytomous logistic regression

**Supplementary Table 5.** Independent associations of multiple pre-diagnosis plasma immune markers with risk of NHL by major histologic subtype of B-cell NHL for the complete follow-up period and stratified by years of follow-up, using polytomous logistic regression

**Supplementary Table 6.** Associations of pre-diagnosis plasma immune marker profiles created through stepwise selection with risk of NHL, overall and by major histologic subtype of NHL, for the complete follow-up period and stratified by years from blood draw to diagnosis/index date

**Supplementary Table 7.** Associations of individual pre-diagnosis plasma immune markers with risk of all NHL, stratified by years of follow-up

**Supplementary Table 8.** Associations of individual plasma immune markers and risk of major histologic subtypes of NHL in the combined cohorts, stratified by years of follow-up



**Supplementary Table 1. Description of immune markers by cohort (pg/mL)**

| Marker          | NHS |             |            |            |                                                       | HPFS |            |            |            |              |
|-----------------|-----|-------------|------------|------------|-------------------------------------------------------|------|------------|------------|------------|--------------|
|                 | N   | Mean        | Median     | Minimum    | Maximum                                               | N    | Mean       | Median     | Minimum    | Maximum      |
|                 |     |             |            |            | <u>Original values*</u>                               |      |            |            |            |              |
| IL-6            | 689 | 9.84        | 7.47       | 0.53       | 792.64                                                | 510  | 8.51       | 7.19       | 1.19       | 57.24        |
| IL-8            | 654 | 30.23       | 8.76       | 1.54       | 6259.12                                               | 487  | 11.14      | 5.85       | 0.63       | 1132.53      |
| IL-10           | 687 | 2.80        | 2.19       | 0.04       | 23.00                                                 | 507  | 2.85       | 2.21       | 0.20       | 13.05        |
| TNF- $\alpha$   | 654 | 28.66       | 26.68      | 5.09       | 178.69                                                | 487  | 29.74      | 28.45      | 7.36       | 65.86        |
| CRP†            | 689 | 11003967.73 | 4559642.35 | 209329.56  | 462764529.00                                          | 510  | 8699651.28 | 2348826.14 | 11800.65   | 504457100.00 |
| sCD14           | 689 | 2142644.13  | 2025343.98 | 1080204.24 | 9922244.05                                            | 510  | 1789479.58 | 1751751.90 | 1089323.23 | 3761290.34   |
| sGP130          | 689 | 370953.04   | 332034.91  | 223577.85  | 1986314.93                                            | 510  | 316457.54  | 311519.56  | 161432.46  | 525071.11    |
| sTNF-R2         | 689 | 4290.46     | 3808.80    | 1722.62    | 22624.52                                              | 510  | 4419.16    | 3869.31    | 1933.82    | 80532.09     |
| sIL-6R $\alpha$ | 689 | 80997.67    | 74227.80   | 26418.37   | 390419.22                                             | 510  | 71172.14   | 68642.09   | 34127.68   | 157703.21    |
| BAFF            | 689 | 1432.82     | 1401.83    | 461.43     | 3159.70                                               | 510  | 1234.76    | 1194.76    | 289.66     | 6083.44      |
| sIL-2R $\alpha$ | 689 | 1295.80     | 1136.68    | 492.48     | 8818.70                                               | 510  | 1404.08    | 1191.71    | 376.05     | 12544.05     |
| CXCL13          | 654 | 57.85       | 37.81      | 7.57       | 3915.66                                               | 487  | 102.73     | 37.19      | 6.41       | 21732.23     |
| sCD30           | 689 | 1532.96     | 1267.16    | 497.92     | 27976.35                                              | 510  | 1435.95    | 1189.95    | 431.53     | 9573.50      |
|                 |     |             |            |            | <u>Batch effect-corrected‡, LN-transformed values</u> |      |            |            |            |              |
| IL-6            | 687 | 1.98        | 1.98       | 0.02       | 4.10                                                  | 510  | 2.00       | 1.99       | 0.18       | 4.01         |
| IL-8            | 644 | 2.19        | 2.16       | 0.46       | 4.35                                                  | 480  | 1.77       | 1.76       | 0.05       | 3.55         |
| IL-10           | 686 | 0.75        | 0.78       | -1.95      | 3.43                                                  | 507  | 0.82       | 0.83       | -1.58      | 2.56         |
| TNF- $\alpha$   | 650 | 3.26        | 3.27       | 2.13       | 4.37                                                  | 487  | 3.34       | 3.36       | 1.94       | 4.17         |
| CRP             | 689 | 15.31       | 15.29      | 12.41      | 19.82                                                 | 506  | 14.76      | 14.66      | 11.51      | 18.86        |
| sCD14           | 679 | 14.53       | 14.52      | 13.94      | 15.30                                                 | 509  | 14.39      | 14.38      | 13.90      | 14.88        |
| sGP130          | 689 | 12.76       | 12.72      | 12.33      | 14.41                                                 | 510  | 12.66      | 12.65      | 12.08      | 13.17        |
| sTNF-R2         | 688 | 8.29        | 8.26       | 7.46       | 9.55                                                  | 505  | 8.31       | 8.28       | 7.55       | 9.43         |
| sIL-6R $\alpha$ | 681 | 11.23       | 11.22      | 10.18      | 12.28                                                 | 510  | 11.16      | 11.15      | 10.49      | 11.97        |
| BAFF            | 686 | 7.25        | 7.25       | 6.36       | 8.07                                                  | 507  | 7.08       | 7.08       | 6.19       | 8.06         |
| sIL-2R $\alpha$ | 680 | 7.06        | 7.03       | 6.20       | 8.24                                                  | 505  | 7.12       | 7.08       | 5.93       | 8.47         |
| CXCL13          | 645 | 3.66        | 3.62       | 1.99       | 5.33                                                  | 480  | 3.67       | 3.61       | 1.85       | 5.62         |
| sCD30           | 684 | 7.19        | 7.14       | 6.31       | 8.76                                                  | 506  | 7.15       | 7.09       | 6.03       | 8.59         |

Abbreviations: NHS indicates Nurses' Health Study; HPFS, Health Professionals Follow-up Study; IL, interleukin; TNF, tumor necrosis factor; CRP, C-reactive protein; sCD14, soluble CD14; sGP130, soluble GP130; sTNF-R2, soluble tumor necrosis factor receptor-2; sIL-6R $\alpha$ , soluble interleukin-6 receptor- $\alpha$ ; BAFF, B-cell activating factor of the TNF family; sIL-2R $\alpha$ , soluble interleukin-2 receptor- $\alpha$ ; CXCL13, CXC chemokine ligand 13; sCD30, soluble CD30.

\* Original values including extrapolated values, but excluding observations with processing delays.

† CRP is presented in pg/mL for consistency; divide by  $1 \times 10^9$  to convert to mg/dL. For example, 11003967.73 pg/mL = 0.01100396773 mg/dL.

‡ Batch effect correction conducted per methods of Rosner, *et al.* (Am J Epidemiol 2008;167:653-66); batch-corrected Ns reflect exclusion of participants missing age at blood draw.

**Supplementary Table 2. Pairwise Spearman correlation coefficients between immune markers among controls only, adjusted for age and cohort (sex)\***

|                 | IL-6 | IL-8 | IL-10 | TNF- $\alpha$ | CRP    | sCD14       | sGP130      | sTNF-R2     | sIL-6R $\alpha$ | BAFF        | sIL2-R $\alpha$ | CXCL13      | sCD30       |
|-----------------|------|------|-------|---------------|--------|-------------|-------------|-------------|-----------------|-------------|-----------------|-------------|-------------|
| IL-6            | 1.00 | 0.10 | 0.15  | <b>0.33</b>   | 0.14   | 0.15        | 0.06        | 0.11        | 0.03            | 0.03        | 0.12            | 0.05        | -0.01       |
| IL-8            |      | 1.00 | 0.13  | <b>0.22</b>   | -0.03  | 0.13        | 0.05        | 0.10        | 0.002           | 0.05        | 0.15            | <b>0.17</b> | 0.10        |
| IL-10           |      |      | 1.00  | <b>0.23</b>   | 0.04   | 0.02        | 0.05        | 0.06        | 0.03            | 0.03        | 0.02            | -0.03       | 0.04        |
| TNF- $\alpha$   |      |      |       | 1.00          | 0.0001 | 0.14        | 0.13        | 0.13        | 0.01            | 0.04        | 0.04            | 0.06        | 0.14        |
| CRP             |      |      |       |               | 1.00   | <b>0.22</b> | 0.04        | <b>0.25</b> | 0.09            | 0.07        | <b>0.19</b>     | 0.07        | -0.04       |
| sCD14           |      |      |       |               |        | 1.00        | <b>0.38</b> | <b>0.42</b> | <b>0.21</b>     | <b>0.18</b> | <b>0.24</b>     | 0.11        | 0.12        |
| sGP130          |      |      |       |               |        |             | 1.00        | <b>0.40</b> | <b>0.34</b>     | <b>0.18</b> | <b>0.17</b>     | 0.10        | <b>0.19</b> |
| sTNF-R2         |      |      |       |               |        |             |             | 1.00        | <b>0.33</b>     | <b>0.24</b> | <b>0.49</b>     | <b>0.23</b> | <b>0.53</b> |
| sIL-6R $\alpha$ |      |      |       |               |        |             |             |             | 1.00            | 0.03        | 0.12            | 0.06        | 0.10        |
| BAFF            |      |      |       |               |        |             |             |             |                 | 1.00        | <b>0.28</b>     | 0.13        | <b>0.26</b> |
| sIL2-R $\alpha$ |      |      |       |               |        |             |             |             |                 |             | 1.00            | <b>0.26</b> | <b>0.58</b> |
| CXCL13          |      |      |       |               |        |             |             |             |                 |             |                 | 1.00        | <b>0.32</b> |
| sCD30           |      |      |       |               |        |             |             |             |                 |             |                 |             | 1.00        |

Abbreviations: NHL, non-Hodgkin lymphoma; B-NHL, all B-cell NHL; T-NHL, all T-cell NHL; OR, odds ratio; CI, confidence interval; SD, standard deviation; IL, interleukin; TNF, tumor necrosis factor; CRP, C-reactive protein; sCD14, soluble CD14; sGP130, soluble GP130; sTNF-R2, soluble tumor necrosis factor receptor-2; sIL-6R $\alpha$ , soluble interleukin-6 receptor- $\alpha$ ; BAFF, B-cell activating factor of the TNF family; sIL-2R $\alpha$ , soluble interleukin-2 receptor- $\alpha$ ; CXCL13, CXC chemokine ligand 13; sCD30, soluble CD30.

\* Bold type signifies  $p < 0.0001$ .

**Supplementary Table 3. Associations of individual pre-diagnosis plasma immune markers with NHL risk, overall and by major histologic subtype, separately for the Nurses' Health Study (NHS) and the Health Professionals Follow-up Study (HPFS) participants**

| Marker                | Cohort               |                                 |                      |                                  |
|-----------------------|----------------------|---------------------------------|----------------------|----------------------------------|
|                       | N cases/<br>controls | NHS<br>OR (95% CI)<br>per 1-SD* | N cases/<br>controls | HPFS<br>OR (95% CI)<br>per 1-SD* |
| <b>All NHL</b>        |                      |                                 |                      |                                  |
| IL-6                  | 343/344              | 1.01 (0.87,1.17)                | 254/256              | 0.93 (0.79,1.09)                 |
| IL-8                  | 319/325              | 1.03 (0.88,1.20)                | 239/241              | 0.96 (0.81,1.15)                 |
| IL-10                 | 343/343              | 1.00 (0.87,1.16)                | 253/254              | 0.99 (0.83,1.17)                 |
| TNF- $\alpha$         | 323/327              | 1.01 (0.87,1.17)                | 243/244              | 1.03 (0.86,1.23)                 |
| CRP                   | 344/345              | 1.07 (0.92,1.25)                | 252/254              | 1.04 (0.87,1.23)                 |
| sCD14                 | 338/341              | 0.94 (0.81,1.09)                | 254/255              | 1.14 (0.96,1.35)                 |
| sGP130                | 338/341              | 0.94 (0.78,1.14)                | 254/255              | <b>1.17 (0.98,1.40)</b>          |
| sTNF-R2               | 343/345              | <b>1.20 (1.04,1.39)</b>         | 249/256              | <b>1.34 (1.12,1.62)</b>          |
| sIL-6R $\alpha$       | 338/343              | 1.08 (0.93,1.26)                | 254/256              | 1.11 (0.95,1.30)                 |
| BAFF                  | 341/345              | 0.88 (0.78,1.00)                | 251/256              | <b>0.79 (0.68,0.91)</b>          |
| sIL-2R $\alpha$       | 335/345              | <b>1.31 (1.14,1.52)</b>         | 250/255              | <b>1.45 (1.23,1.71)</b>          |
| CXCL13                | 315/330              | <b>1.32 (1.15,1.51)</b>         | 239/241              | <b>1.30 (1.10,1.54)</b>          |
| sCD30                 | 339/345              | <b>1.29 (1.12,1.49)</b>         | 251/255              | <b>1.48 (1.26,1.74)</b>          |
| <b>B-NHL Subtypes</b> |                      |                                 |                      |                                  |
| All B-NHL             | N cases              |                                 | N cases              |                                  |
| IL-6                  | 290                  | 1.03 (0.89,1.21)                | 212                  | 0.91 (0.77,1.07)                 |
| IL-8                  | 267                  | 1.07 (0.91,1.26)                | 199                  | 0.97 (0.81,1.16)                 |
| IL-10                 | 290                  | 1.00 (0.86,1.16)                | 211                  | 0.96 (0.80,1.14)                 |
| TNF- $\alpha$         | 271                  | 0.99 (0.85,1.17)                | 202                  | 0.98 (0.81,1.19)                 |
| CRP                   | 291                  | 1.08 (0.92,1.27)                | 210                  | 1.02 (0.85,1.23)                 |
| sCD14                 | 286                  | 0.89 (0.76,1.05)                | 212                  | 1.13 (0.94,1.35)                 |
| sGP130                | 286                  | 0.92 (0.75,1.12)                | 212                  | 1.14 (0.95,1.37)                 |
| sTNF-R2               | 290                  | <b>1.20 (1.03,1.40)</b>         | 207                  | <b>1.36 (1.12,1.65)</b>          |
| sIL-6R $\alpha$       | 286                  | 1.07 (0.91,1.25)                | 212                  | 1.10 (0.93,1.30)                 |
| BAFF                  | 288                  | <b>0.86 (0.76,0.99)</b>         | 209                  | <b>0.75 (0.64,0.88)</b>          |
| sIL-2R $\alpha$       | 285                  | <b>1.31 (1.12,1.52)</b>         | 208                  | <b>1.48 (1.25,1.77)</b>          |
| CXCL13                | 266                  | <b>1.30 (1.12,1.50)</b>         | 199                  | <b>1.26 (1.06,1.50)</b>          |
| sCD30                 | 288                  | <b>1.31 (1.12,1.52)</b>         | 210                  | <b>1.45 (1.22,1.72)</b>          |
| <b>DLBCL</b>          |                      |                                 |                      |                                  |
| IL-6                  | 70                   | 1.14 (0.87,1.49)                | 44                   | 1.08 (0.79,1.49)                 |
| IL-8                  | 63                   | 0.97 (0.73,1.29)                | 43                   | 0.97 (0.70,1.34)                 |
| IL-10                 | 69                   | 1.08 (0.83,1.40)                | 44                   | 1.26 (0.91,1.76)                 |
| TNF- $\alpha$         | 65                   | 0.94 (0.72,1.24)                | 43                   | 1.02 (0.73,1.42)                 |
| CRP                   | 70                   | 1.00 (0.77,1.30)                | 44                   | 1.34 (0.98,1.84)                 |
| sCD14                 | 70                   | 0.80 (0.61,1.06)                | 44                   | 1.15 (0.84,1.58)                 |
| sGP130                | 70                   | 0.78 (0.53,1.14)                | 44                   | 1.03 (0.73,1.44)                 |

|                 |    |                  |    |                         |
|-----------------|----|------------------|----|-------------------------|
| sTNF-R2         | 70 | 0.84 (0.63,1.12) | 44 | 1.36 (0.98,1.89)        |
| sIL-6R $\alpha$ | 70 | 0.82 (0.62,1.09) | 44 | 1.01 (0.74,1.40)        |
| BAFF            | 70 | 0.97 (0.76,1.24) | 44 | 1.02 (0.75,1.38)        |
| sIL-2R $\alpha$ | 70 | 1.05 (0.80,1.37) | 44 | <b>1.61 (1.19,2.19)</b> |
| CXCL13          | 65 | 1.21 (0.95,1.55) | 42 | 1.31 (0.96,1.78)        |
| sCD30           | 70 | 1.14 (0.88,1.48) | 44 | <b>1.51 (1.14,2.01)</b> |

#### FL

|                 |    |                         |    |                         |
|-----------------|----|-------------------------|----|-------------------------|
| IL-6            | 63 | 1.04 (0.80,1.45)        | 29 | <b>0.63 (0.41,0.97)</b> |
| IL-8            | 58 | 1.16 (0.89,1.52)        | 26 | 0.84 (0.56,1.26)        |
| IL-10           | 63 | 1.03 (0.79,1.34)        | 28 | 0.90 (0.61,1.33)        |
| TNF- $\alpha$   | 60 | 1.12 (0.84,1.48)        | 27 | 1.23 (0.80,1.88)        |
| CRP             | 63 | 1.23 (0.94,1.61)        | 29 | 0.87 (0.57,1.32)        |
| sCD14           | 61 | 0.82 (0.61,1.11)        | 29 | 1.30 (0.88,1.91)        |
| sGP130          | 62 | 1.11 (0.81,1.53)        | 29 | 1.34 (0.88,2.05)        |
| sTNF-R2         | 62 | <b>1.45 (1.11,1.90)</b> | 28 | 1.19 (0.78,1.84)        |
| sIL-6R $\alpha$ | 62 | 1.18 (0.90,1.55)        | 29 | 1.09 (0.74,1.60)        |
| BAFF            | 63 | 0.93 (0.72,1.21)        | 29 | 0.91 (0.61,1.36)        |
| sIL-2R $\alpha$ | 62 | <b>1.65 (1.26,2.17)</b> | 29 | 1.34 (0.92,1.96)        |
| CXCL13          | 59 | <b>1.66 (1.29,2.14)</b> | 27 | <b>1.46 (1.00,2.14)</b> |
| sCD30           | 62 | <b>1.86 (1.44,2.40)</b> | 28 | <b>1.51 (1.06,2.14)</b> |

#### CLL/SLL

|                 |    |                               |    |                         |
|-----------------|----|-------------------------------|----|-------------------------|
| IL-6            | 84 | 1.03 (0.80,1.31)              | 81 | 0.96 (0.76,1.21)        |
| IL-8            | 79 | 0.95 (0.74,1.23) <sup>†</sup> | 77 | 1.03 (0.79,1.34)        |
| IL-10           | 84 | 0.83 (0.66,1.05)              | 81 | 0.87 (0.68,1.12)        |
| TNF- $\alpha$   | 79 | 1.03 (0.80,1.32) <sup>†</sup> | 79 | 1.10 (0.85,1.42)        |
| CRP             | 84 | 0.94 (0.73,1.20)              | 81 | 0.92 (0.71,1.19)        |
| sCD14           | 83 | 0.82 (0.63,1.06)              | 81 | 1.06 (0.82,1.35)        |
| sGP130          | 82 | 0.85 (0.60,1.20)              | 81 | 1.22 (0.95,1.56)        |
| sTNF-R2         | 84 | 1.16 (0.92,1.45)              | 80 | <b>1.49 (1.14,1.95)</b> |
| sIL-6R $\alpha$ | 84 | 1.19 (0.94,1.51)              | 81 | 1.11 (0.88,1.39)        |
| BAFF            | 84 | <b>0.58 (0.46,0.73)</b>       | 79 | <b>0.48 (0.37,0.63)</b> |
| sIL-2R $\alpha$ | 82 | <b>1.40 (1.11,1.77)</b>       | 80 | <b>1.61 (1.26,2.05)</b> |
| CXCL13          | 78 | 1.02 (0.80,1.30) <sup>†</sup> | 78 | 1.19 (0.93,1.52)        |
| sCD30           | 83 | 1.19 (0.95,1.49)              | 80 | <b>1.56 (1.22,1.99)</b> |

#### Other B-NHL<sup>‡</sup>

|               |    |                          |    |                          |
|---------------|----|--------------------------|----|--------------------------|
| IL-6          | 73 | 0.96 (0.75, 1.23)        | 58 | 0.80 (0.60, 1.07)        |
| IL-8          | 67 | 1.23 (0.96, 1.57)        | 53 | 0.93 (0.69, 1.26)        |
| IL-10         | 74 | 1.15 (0.89, 1.48)        | 53 | 0.92 (0.70, 1.21)        |
| TNF- $\alpha$ | 67 | 0.92 (0.71, 1.19)        | 58 | <b>0.72 (0.54, 0.96)</b> |
| CRP           | 74 | 1.23 (0.95, 1.59)        | 56 | 1.02 (0.75, 1.39)        |
| sCD14         | 72 | 1.13 (0.88, 1.44)        | 58 | 1.15 (0.86, 1.53)        |
| sGP130        | 72 | 0.94 (0.68, 1.29)        | 58 | 1.09 (0.81, 1.46)        |
| sTNF-R2       | 74 | <b>1.41 (1.12, 1.78)</b> | 55 | 1.25 (0.93, 1.68)        |

|                 |    |                          |    |                          |
|-----------------|----|--------------------------|----|--------------------------|
| sIL-6R $\alpha$ | 70 | 1.07 (0.83, 1.39)        | 58 | 1.21 (0.92, 1.60)        |
| BAFF            | 71 | 1.02 (0.80, 1.29)        | 57 | <b>0.77 (0.60, 0.99)</b> |
| sIL-2R $\alpha$ | 71 | <b>1.35 (1.05, 1.73)</b> | 55 | <b>1.48 (1.13, 1.95)</b> |
| CXCL13          | 64 | <b>1.61 (1.28, 2.03)</b> | 52 | <b>1.34 (1.02, 1.76)</b> |
| sCD30           | 73 | 1.24 (0.98, 1.59)        | 58 | <b>1.35 (1.06, 1.71)</b> |

| <b>All T-NHL§</b> |    |                          |    |                          |
|-------------------|----|--------------------------|----|--------------------------|
| IL-6              | 18 | 1.09 (0.68, 1.74)        | 12 | 1.19 (0.65, 2.18)        |
| IL-8              | 18 | 0.61 (0.35, 1.08)        | 11 | 1.31 (0.66, 2.64)        |
| IL-10             | 18 | 1.00 (0.62, 1.61)        | 12 | 1.64 (0.87, 3.09)        |
| TNF- $\alpha$     | 18 | 1.00 (0.61, 1.65)        | 11 | 1.37 (0.74, 2.54)        |
| CRP               | 18 | 0.87 (0.54, 1.41)        | 12 | 1.16 (0.63, 2.14)        |
| sCD14             | 18 | 0.78 (0.46, 1.34)        | 12 | 1.31 (0.65, 2.64)        |
| sGP130            | 18 | 0.70 (0.35, 1.37)        | 12 | 1.16 (0.42, 3.22)        |
| sTNF-R2           | 18 | 0.89 (0.54, 1.47)        | 12 | 1.30 (0.70, 2.41)        |
| sIL-6R $\alpha$   | 18 | 0.93 (0.59, 1.46)        | 12 | 1.23 (0.61, 2.47)        |
| BAFF              | 18 | 1.15 (0.69, 1.92)        | 12 | 1.38 (0.83, 2.32)        |
| sIL-2R $\alpha$   | 18 | <b>1.79 (1.10, 2.92)</b> | 12 | <b>2.24 (1.28, 3.91)</b> |
| CXCL13            | 18 | 1.33 (0.83, 2.13)        | 10 | 1.12 (0.64, 1.97)        |
| sCD30             | 18 | 1.25 (0.81, 1.92)        | 11 | <b>1.87 (1.12, 3.12)</b> |

Abbreviations: NHL, non-Hodgkin lymphoma; NHS, Nurses' Health Study; HPFS, Health Professionals Follow-up Study; B-NHL, all B-cell NHL; T-NHL, all T-cell NHL; OR, odds ratio; CI, confidence interval; SD, standard deviation; IL, interleukin; TNF, tumor necrosis factor; CRP, C-reactive protein; sCD14, soluble CD14; sGP130, soluble GP130; sTNF-R2, soluble tumor necrosis factor receptor-2; sIL-6R $\alpha$ , soluble interleukin-6 receptor- $\alpha$ ; BAFF, B-cell activating factor of the TNF family; sIL-2R $\alpha$ , soluble interleukin-2 receptor- $\alpha$ ; CXCL13, CXC chemokine ligand 13; sCD30, soluble CD30.

\* All models were adjusted for age at blood draw, time of day of blood draw and race unless otherwise noted.

† Models were adjusted for age at blood draw and time of day of blood draw.

‡ Other B-cell subtypes included Burkitt lymphoma (N=4), lymphoplasmacytic lymphoma (N=19), mantle cell lymphoma (N=20), marginal zone lymphoma (N=44), other B-NHL (N=20), and unclassified B-NHL (N=25).

§ Models were adjusted for age at blood draw only.

**Supplementary Table 4. Independent associations of multiple pre-diagnosis plasma immune markers with risk of NHL, overall and by B or T cell type of origin, for the complete follow-up period and stratified by years of follow-up, using polytomous logistic regression**

| Marker*                          | Years from blood draw to diagnosis/index date |                          |                      |                          |                      |                          |                      |                          |                      |  |
|----------------------------------|-----------------------------------------------|--------------------------|----------------------|--------------------------|----------------------|--------------------------|----------------------|--------------------------|----------------------|--|
|                                  | Complete follow-up period <sup>¶</sup>        |                          | 0 to less than 5     |                          | 5 to less than 10    |                          | 10 or more           |                          | P-value <sup>§</sup> |  |
|                                  | N cases <sup>†</sup>                          | OR (95% CI) per 1-SD ‡,^ | N cases <sup>†</sup> | OR (95% CI) per 1-SD ‡,^ | N cases <sup>†</sup> | OR (95% CI) per 1-SD ‡,^ | N cases <sup>†</sup> | OR (95% CI) per 1-SD ‡,^ |                      |  |
| <b>All NHL<sup>  </sup></b>      |                                               |                          |                      |                          |                      |                          |                      |                          |                      |  |
| <i>sTNF-R2</i>                   | 542                                           | 1.05 (0.91, 1.21)        | 133                  | 0.83 (0.60, 1.14)        | 149                  | 1.02 (0.77, 1.35)        | 260                  | 1.18 (0.95, 1.46)        | 0.20                 |  |
| <i>sIL-2R<math>\alpha</math></i> | 542                                           | <b>1.20 (1.03, 1.39)</b> | 133                  | <b>1.52 (1.09, 2.11)</b> | 149                  | 1.16 (0.88, 1.53)        | 260                  | 1.11 (0.88, 1.39)        | 0.28                 |  |
| <i>CXCL13</i>                    | 542                                           | <b>1.17 (1.03, 1.32)</b> | 133                  | 1.00 (0.78, 1.29)        | 149                  | <b>1.30 (1.03, 1.62)</b> | 260                  | <b>1.21 (1.01, 1.46)</b> | 0.32                 |  |
| <i>sCD30</i>                     | 542                                           | <b>1.24 (1.06, 1.45)</b> | 133                  | <b>1.52 (1.09, 2.13)</b> | 149                  | <b>1.43 (1.07, 1.90)</b> | 260                  | 0.98 (0.78, 1.23)        | 0.02                 |  |
| <i>BAFF</i>                      | 542                                           | <b>0.74 (0.66, 0.83)</b> | 133                  | <b>0.73 (0.59, 0.91)</b> | 149                  | <b>0.61 (0.48, 0.78)</b> | 260                  | 0.83 (0.69, 1.00)        | 0.15                 |  |
| <b>All B-NHL</b>                 |                                               |                          |                      |                          |                      |                          |                      |                          |                      |  |
| <i>sTNF-R2</i>                   | 454                                           | 1.08 (0.93, 1.26)        | 110                  | 0.91 (0.65, 1.25)        | 118                  | 1.14 (0.85, 1.53)        | 226                  | 1.14 (0.91, 1.44)        | 0.04                 |  |
| <i>sIL-2R<math>\alpha</math></i> | 454                                           | <b>1.20 (1.03, 1.40)</b> | 110                  | <b>1.46 (1.03, 2.07)</b> | 118                  | 1.16 (0.87, 1.54)        | 226                  | 1.14 (0.91, 1.44)        | 0.06                 |  |
| <i>CXCL13</i>                    | 454                                           | <b>1.14 (1.00, 1.29)</b> | 110                  | 0.99 (0.75, 1.30)        | 118                  | 1.19 (0.93, 1.51)        | 226                  | <b>1.22 (1.02, 1.47)</b> | 0.46                 |  |
| <i>sCD30</i>                     | 454                                           | <b>1.24 (1.05, 1.46)</b> | 110                  | <b>1.55 (1.09, 2.21)</b> | 118                  | <b>1.57 (1.14, 2.16)</b> | 226                  | 0.96 (0.75, 1.23)        | 0.03                 |  |
| <i>BAFF</i>                      | 454                                           | <b>0.74 (0.66, 0.83)</b> | 110                  | 0.70 (0.56, 0.87)        | 118                  | <b>0.64 (0.51, 0.81)</b> | 226                  | 0.85 (0.71, 1.02)        | 0.30                 |  |
| <b>All T-NHL</b>                 |                                               |                          |                      |                          |                      |                          |                      |                          |                      |  |
| <i>sTNF-R2</i>                   | 28                                            | 0.64 (0.39, 1.04)        | 11                   | 0.54 (0.24, 1.22)        | 10                   | 0.60 (0.26, 1.39)        | 7                    | 0.74 (0.25, 2.21)        | 0.94                 |  |
| <i>sIL-2R<math>\alpha</math></i> | 28                                            | <b>1.73 (1.11, 2.69)</b> | 11                   | 2.10 (0.97, 4.53)        | 10                   | 1.79 (0.90, 3.54)        | 7                    | 0.96 (0.35, 2.62)        | 0.33                 |  |
| <i>CXCL13</i>                    | 28                                            | 1.03 (0.72, 1.47)        | 11                   | 0.84 (0.46, 1.55)        | 10                   | 1.48 (0.85, 2.58)        | 7                    | 0.66 (0.32, 1.37)        | 0.64                 |  |
| <i>sCD30</i>                     | 28                                            | 1.30 (0.83, 2.03)        | 11                   | 1.47 (0.69, 3.14)        | 10                   | 1.16 (0.53, 2.53)        | 7                    | 1.90 (0.73, 4.93)        | 0.77                 |  |
| <i>BAFF</i>                      | 28                                            | 0.96 (0.70, 1.32)        | 11                   | 1.00 (0.62, 1.60)        | 10                   | 0.74 (0.43, 1.27)        | 7                    | 1.32 (0.61, 2.86)        | 0.36                 |  |

Abbreviations: NHL, Non-Hodgkin lymphoma; B-NHL, all B-cell NHL; T-NHL, all T-cell NHL; OR, Odds Ratio; CI, Confidence Interval; SD, Standard Deviation; sTNF-R2, soluble tumor necrosis factor receptor-2; sIL-2R $\alpha$ , soluble interleukin-2 receptor- $\alpha$ ; CXCL13, CXC chemokine ligand 13; sCD30, soluble CD30; BAFF, B-cell activating factor of the TNF family.

\* Values are batch effect-corrected and exclude cohort-specific outliers.

<sup>†</sup> The models for the full follow-up period included 571 controls. Each of the models for 0 to <5 year, 5 to <10 year and 10 or more year intervals after blood draw included 140, 162 and 267 controls, respectively.

<sup>‡</sup> Unstratified models adjusted for age at blood draw (continuous), cohort (HPFS, NHS), time of blood draw (continuous) and race/ethnicity (Caucasian, non-Caucasian). The time-stratified models were not adjusted for race. The models were mutually adjusted for all immune markers listed.

<sup>^</sup> Odds Ratios and 95% Confidence Intervals were calculated per standard deviation of natural log-transformed values, in HPFS and NHS combined.

¶ In unstratified analyses, only sTNF-R2 demonstrated significant heterogeneity by tumor cell type ( $p=0.04$ ); all other  $p$ -values for heterogeneity by tumor cell type were  $\geq 0.10$ .

§  $P$ -values from tests for heterogeneity comparing effect estimates for each immune marker-endpoint association across time strata, based on inclusion of an interaction term for biomarker\* time period in the corresponding model for the complete time period.

|| The all NHL models in italics are included for comparison purposes. These models used unconditional logistic regression, and were not compared statistically with any subtypes.

**Supplementary Table 5. Independent associations of multiple pre-diagnosis plasma immune markers with risk of NHL by major histologic subtype of B-cell NHL for the complete follow-up period and stratified by years of follow-up, using polytomous logistic regression**

| Marker                          | Years from blood draw to diagnosis/index date |                                      |                      |                                      |                      |                                      |                      |                                      |                      |
|---------------------------------|-----------------------------------------------|--------------------------------------|----------------------|--------------------------------------|----------------------|--------------------------------------|----------------------|--------------------------------------|----------------------|
|                                 | Complete follow-up period*                    |                                      | 0 to less than 5     |                                      | 5 to less than 10    |                                      | 10 or more           |                                      | P-value <sup>¶</sup> |
|                                 | N cases <sup>†</sup>                          | OR (95% CI) per 1-SD <sup>‡, §</sup> | N cases <sup>†</sup> | OR (95% CI) per 1-SD <sup>‡, §</sup> | N cases <sup>†</sup> | OR (95% CI) per 1-SD <sup>‡, §</sup> | N cases <sup>†</sup> | OR (95% CI) per 1-SD <sup>‡, §</sup> |                      |
| <b>DLBCL</b>                    |                                               |                                      |                      |                                      |                      |                                      |                      |                                      |                      |
| sTNF-R2                         | 107                                           | 0.83 (0.64, 1.08)                    | 25                   | 0.65 (0.37, 1.15)                    | 25                   | 0.99 (0.58, 1.69)                    | 57                   | 0.85 (0.56, 1.28)                    | 0.20                 |
| sIL-2R $\alpha$                 | 107                                           | 1.13 (0.87, 1.45)                    | 25                   | 1.65 (0.91, 2.99)                    | 25                   | 1.01 (0.61, 1.65)                    | 57                   | 1.07 (0.73, 1.57)                    | 0.20                 |
| CXCL13                          | 107                                           | 1.14 (0.93, 1.40)                    | 25                   | 0.76 (0.47, 1.21)                    | 25                   | 1.40 (0.95, 2.07)                    | 57                   | 1.27 (0.95, 1.71)                    | 0.21                 |
| sCD30                           | 107                                           | 1.24 (0.96, 1.62)                    | 25                   | 0.99 (0.53, 1.83)                    | 25                   | <b>1.93 (1.18, 3.18)</b>             | 57                   | 1.10 (0.75, 1.62)                    | 0.98                 |
| BAFF                            | 107                                           | 0.94 (0.78, 1.14)                    | 25                   | 0.98 (0.66, 1.46)                    | 25                   | <b>0.68 (0.47, 0.97)</b>             | 57                   | 1.11 (0.83, 1.48)                    | 0.47                 |
| <b>FL</b>                       |                                               |                                      |                      |                                      |                      |                                      |                      |                                      |                      |
| sTNF-R2                         | 83                                            | 1.04 (0.78, 1.38)                    | 18                   | 0.65 (0.30, 1.42)                    | 22                   | 0.91 (0.52, 1.59)                    | 43                   | 1.45 (0.99, 2.10)                    | 0.0007               |
| sIL-2R $\alpha$                 | 83                                            | 1.01 (0.76, 1.34)                    | 18                   | 0.74 (0.35, 1.56)                    | 22                   | 1.12 (0.67, 1.87)                    | 43                   | 1.03 (0.68, 1.55)                    | 0.95                 |
| CXCL13                          | 83                                            | 1.21 (0.97, 1.51)                    | 18                   | 0.86 (0.53, 1.41)                    | 22                   | 1.14 (0.74, 1.75)                    | 43                   | <b>1.42 (1.03, 1.97)</b>             | 0.15                 |
| sCD30                           | 83                                            | <b>1.65 (1.24, 2.19)</b>             | 18                   | <b>4.34 (2.13, 8.85)</b>             | 22                   | 1.67 (0.96, 2.90)                    | 43                   | 1.08 (0.70, 1.67)                    | 0.001                |
| BAFF                            | 83                                            | <b>0.81 (0.66, 0.99)</b>             | 18                   | 0.79 (0.50, 1.24)                    | 22                   | 0.83 (0.55, 1.23)                    | 43                   | 0.78 (0.57, 1.06)                    | 0.40                 |
| <b>CLL/SLL</b>                  |                                               |                                      |                      |                                      |                      |                                      |                      |                                      |                      |
| sTNF-R2                         | 153                                           | 1.23 (0.99, 1.53)                    | 36                   | 1.03 (0.61, 1.71)                    | 44                   | 1.33 (0.88, 2.02)                    | 73                   | 1.20 (0.86, 1.66)                    | 0.29                 |
| sIL-2R $\alpha$                 | 153                                           | <b>1.40 (1.12, 1.74)</b>             | 36                   | <b>2.43 (1.40, 4.23)</b>             | 44                   | 1.34 (0.90, 2.00)                    | 73                   | 1.19 (0.85, 1.67)                    | 0.008                |
| CXCL13                          | 153                                           | 0.88 (0.73, 1.06)                    | 36                   | 0.79 (0.50, 1.22)                    | 44                   | 0.75 (0.51, 1.11)                    | 73                   | 1.00 (0.76, 1.30)                    | 0.30                 |
| sCD30                           | 153                                           | 1.20 (0.94, 1.52)                    | 36                   | 1.42 (0.82, 2.47)                    | 44                   | <b>1.59 (1.01, 2.53)</b>             | 73                   | 0.93 (0.65, 1.34)                    | 0.18                 |
| BAFF                            | 153                                           | <b>0.55 (0.46, 0.65)</b>             | 36                   | <b>0.46 (0.33, 0.65)</b>             | 44                   | <b>0.48 (0.34, 0.67)</b>             | 73                   | <b>0.70 (0.54, 0.91)</b>             | 0.10                 |
| <b>Other B-NHL<sup>  </sup></b> |                                               |                                      |                      |                                      |                      |                                      |                      |                                      |                      |
| sTNF-R2                         | 111                                           | 1.17 (0.92, 1.49)                    | 31                   | 1.16 (0.72, 1.86)                    | 27                   | 1.19 (0.73, 1.94)                    | 53                   | 1.13 (0.78, 1.66)                    | 0.69                 |
| sIL-2R $\alpha$                 | 111                                           | 1.16 (0.91, 1.48)                    | 31                   | 1.19 (0.71, 2.00)                    | 27                   | 1.03 (0.64, 1.64)                    | 53                   | 1.28 (0.87, 1.87)                    | 0.74                 |
| CXCL13                          | 111                                           | <b>1.45 (1.19, 1.75)</b>             | 31                   | 1.41 (0.95, 2.09)                    | 27                   | <b>1.66 (1.16, 2.37)</b>             | 53                   | 1.32 (0.97, 1.80)                    | 0.46                 |



|       |     |                          |    |                   |    |                   |    |                   |      |
|-------|-----|--------------------------|----|-------------------|----|-------------------|----|-------------------|------|
| sCD30 | 111 | 1.05 (0.81, 1.37)        | 31 | 1.47 (0.86, 2.50) | 27 | 1.26 (0.76, 2.10) | 53 | 0.80 (0.52, 1.21) | 0.13 |
| BAFF  | 111 | <b>0.81 (0.68, 0.97)</b> | 31 | 0.72 (0.52, 1.00) | 27 | 0.74 (0.53, 1.06) | 53 | 0.92 (0.69, 1.23) | 0.56 |

Abbreviations: NHL, Non-Hodgkin lymphoma; B-NHL, all B-cell NHL; T-NHL, all T-cell NHL; OR, Odds Ratio; CI, Confidence Interval; SD, Standard Deviation; sTNF-R2, soluble tumor necrosis factor receptor-2; sIL-2R $\alpha$ , soluble interleukin-2 receptor- $\alpha$ ; CXCL13, CXC chemokine ligand 13; sCD30, soluble CD30; BAFF, B-cell activating factor of the TNF family.

\* In unstratified analyses, CXCL13 ( $p=0.0007$ ) and BAFF ( $p<0.0001$ ) demonstrated significant heterogeneity by B-NHL histologic subtype; all other  $p$ -values for heterogeneity by B-NHL histologic subtype were  $\geq 0.08$ .

† Each model for the complete follow-up period included 571 controls. Each model for the 0 to <5, 5 to <10 and 10 or more year intervals after blood draw included 140, 162 and 267 controls, respectively.

‡ Unstratified models adjusted for age at blood draw (continuous), cohort (sex), time of blood draw (continuous) and race/ethnicity (Caucasian, non-Caucasian); time-stratified models were not adjusted for race. Models were mutually adjusted for all immune markers listed.

§ Odds ratios and 95% confidence intervals were calculated per standard deviation of batch effect-corrected, log-transformed values from the combined Nurses' Health Study and Health Professionals Follow-up Study cohorts.

¶  $P$ -values from test for heterogeneity comparing immune marker-specific effect estimates across time strata, based on inclusion of interaction terms for biomarker\*time period in the PLR model for the complete follow-up period.

|| Other B-NHL subtypes include Burkitt lymphoma (N=4), lymphoplasmacytic lymphoma (N=19), mantle cell lymphoma (N=20), marginal zone lymphoma (N=39), other B-NHL (N=20), and unclassified B-NHL (N=25).

**Supplementary Table 6. Associations of pre-diagnosis plasma immune marker profiles created through stepwise selection with risk of NHL, overall and by major histologic subtype of NHL, for the complete follow-up period and stratified by years from blood draw to diagnosis/index date**

| Marker*                         | Complete Follow-up Period |                                        | Years from blood draw to diagnosis/index date |                                        |                      |                                        |                      |                                        |
|---------------------------------|---------------------------|----------------------------------------|-----------------------------------------------|----------------------------------------|----------------------|----------------------------------------|----------------------|----------------------------------------|
|                                 | N cases/<br>controls      | OR per 1-SD<br>(95% CI) <sup>†,‡</sup> | 0 to less than 5                              |                                        | 5 to less than 10    |                                        | 10 or more           |                                        |
|                                 |                           |                                        | N cases/<br>controls                          | OR per 1-SD<br>(95% CI) <sup>†,‡</sup> | N cases/<br>controls | OR per 1-SD<br>(95% CI) <sup>†,‡</sup> | N cases/<br>controls | OR per 1-SD (95%<br>CI) <sup>†,‡</sup> |
| <b>All NHL</b>                  |                           |                                        |                                               |                                        |                      |                                        |                      |                                        |
| sCD30                           | 544/571                   | <b>1.26 (1.08, 1.46)</b>               | 134/140                                       | <b>1.48 (1.06, 2.05)</b>               | 149/162              | <b>1.59 (1.19, 2.12)</b>               | 261/267              | 1.03 (0.83, 1.28)                      |
| BAFF                            | 544/571                   | <b>0.74 (0.66, 0.83)</b>               | 134/140                                       | <b>0.72 (0.58, 0.90)</b>               | 149/162              | <b>0.61 (0.48, 0.78)</b>               | 261/267              | 0.85 (0.70, 1.02)                      |
| CXCL13                          | 544/571                   | <b>1.17 (1.04, 1.32)</b>               | 134/140                                       | 1.00 (0.78, 1.28)                      | 149/162              | <b>1.30 (1.03, 1.63)</b>               | 261/267              | <b>1.22 (1.01, 1.46)</b>               |
| sIL-2R $\alpha$                 | 544/571                   | <b>1.21 (1.05, 1.40)</b>               | 134/140                                       | <b>1.41 (1.05, 1.89)</b>               | 149/162              | 1.16 (0.89, 1.53)                      | 261/267              | 1.15 (0.92, 1.43)                      |
| <b>B-NHL Subtypes</b>           |                           |                                        |                                               |                                        |                      |                                        |                      |                                        |
| <b>DLBCL</b>                    |                           |                                        |                                               |                                        |                      |                                        |                      |                                        |
| sCD30                           | 114/599                   | <b>1.29 (1.06, 1.56)</b>               | 26/154                                        | 0.96 (0.62, 1.49)                      | 27/165               | <b>1.92 (1.30, 2.84)</b>               | 61/278               | 1.18 (0.90, 1.54)                      |
| <b>FL<sup>§</sup></b>           |                           |                                        |                                               |                                        |                      |                                        |                      |                                        |
| sCD30                           | 90/598                    | <b>1.76 (1.43, 2.15)</b>               | 21/154                                        | <b>3.10 (1.93, 4.98)</b>               | 22/164               | <b>1.75 (1.15, 2.67)</b>               | 47/278               | 1.32 (0.98, 1.76)                      |
| <b>CLL/SLL<sup>§</sup></b>      |                           |                                        |                                               |                                        |                      |                                        |                      |                                        |
| sCD30                           | 160/594                   | 1.20 (0.96, 1.51)                      | 37/153                                        | 1.46 (0.78, 2.74)                      | 46/163               | <b>1.59 (1.06, 2.40)</b>               | 77/276               | 0.98 (0.70, 1.36)                      |
| BAFF                            | 160/594                   | <b>0.48 (0.39, 0.59)</b>               | 37/153                                        | <b>0.32 (0.20, 0.53)</b>               | 46/163               | <b>0.40 (0.26, 0.61)</b>               | 77/276               | <b>0.67 (0.49, 0.92)</b>               |
| IL-10                           | 160/594                   | <b>0.83 (0.69, 0.99)</b>               | 37/153                                        | 0.99 (0.63, 1.56)                      | 46/163               | 0.78 (0.53, 1.13)                      | 77/276               | <b>0.77 (0.60, 0.99)</b>               |
| sIL-2R $\alpha$                 | 160/594                   | <b>1.52 (1.22, 1.90)</b>               | 37/153                                        | <b>3.07 (1.68, 5.62)</b>               | 46/163               | 1.36 (0.89, 2.08)                      | 77/276               | 1.21 (0.85, 1.71)                      |
| <b>Other B-NHL<sup>  </sup></b> |                           |                                        |                                               |                                        |                      |                                        |                      |                                        |
| CXCL13                          | 111/569                   | <b>1.48 (1.22, 1.79)</b>               | 31/140                                        | <b>1.64 (1.13, 2.38)</b>               | 27/160               | <b>1.56 (1.11, 2.19)</b>               | 53/267               | 1.30 (0.95, 1.76)                      |
| BAFF                            | 111/569                   | <b>0.80 (0.67, 0.97)</b>               | 31/140                                        | 0.80 (0.59, 1.09)                      | 27/160               | 0.78 (0.53, 1.15)                      | 53/267               | 0.87 (0.62, 1.20)                      |
| sIL-2R $\alpha$                 | 111/569                   | <b>1.25 (1.02, 1.53)</b>               | 31/140                                        | 1.41 (0.97, 2.05)                      | 27/160               | 1.27 (0.82, 1.95)                      | 53/267               | 1.19 (0.86, 1.65)                      |
| <b>T-cell NHL<sup>§</sup></b>   |                           |                                        |                                               |                                        |                      |                                        |                      |                                        |
| sIL-2R $\alpha$                 | 30/598                    | <b>1.97 (1.37, 2.85)</b>               | 13/154                                        | <b>2.26 (1.31, 3.89)</b>               | 10/164               | 1.91 (0.93, 3.92)                      | 7/278                | 1.30 (0.59, 2.85)                      |

Abbreviations: NHL, non-Hodgkin lymphoma; OR, odds ratio; CI, confidence interval; SD, standard deviation; DLBCL, diffuse large B-cell lymphoma; FL, follicular lymphoma; CLL/SLL, chronic lymphocytic leukemia/small lymphocytic lymphoma; IL, interleukin; sTNF-R2, soluble tumor necrosis factor receptor-2; sIL-2R $\alpha$ , soluble interleukin-2 receptor- $\alpha$ ; CXCL13, CXC chemokine ligand 13; sCD30, soluble CD30; BAFF, B-cell activating factor of the TNF family.

\* Immune markers are listed in the order in which they were selected through the stepwise selection procedure.

† Odds ratios and 95% confidence intervals were calculated per 1 standard deviation increase in biomarker concentration, based on batch effect-corrected, log-transformed values with outliers removed, for Nurses' Health Study and Health Professionals Follow-up Study cohorts combined.

‡ All models were adjusted for age at blood draw, race, time of blood draw, cohort, and the other listed biomarkers unless otherwise noted.

§ T-NHL models were not adjusted for race due to sparse cell counts.

|| Other B-cell subtypes included Burkitt lymphoma (N=4), lymphoplasmacytic lymphoma (N=19), mantle cell lymphoma (N=20), marginal zone lymphoma (N=44), other B-NHL (N=20), and unclassified B-NHL (N=25); time-stratified models for other B-NHL not adjusted for race due to sparse cell counts.

**Supplementary Table 7. Associations of individual pre-diagnosis plasma immune markers with risk of all NHL, stratified by years of follow-up**

| Marker          | Years from blood draw to diagnosis/index date |                           |                      |                          |                      |                          |   |
|-----------------|-----------------------------------------------|---------------------------|----------------------|--------------------------|----------------------|--------------------------|---|
|                 | 0 to less than 5                              |                           | 5 to less than 10    |                          | 10 or more           |                          |   |
|                 | N cases/<br>controls                          | OR (95% CI)<br>per 1-SD*† | N cases/<br>controls | OR (95% CI)<br>per 1-SD* | N cases/<br>controls | OR (95% CI)<br>per 1-SD* |   |
| IL-6            | 154/155                                       | 1.01 (0.81, 1.24)         | 165/165              | 0.87 (0.71, 1.07)        | 278/278              | 1.03 (0.88, 1.22)        |   |
| IL-8            | 142/141                                       | 1.04 (0.81, 1.33)         | 154/158              | 1.09 (0.85, 1.39)        | 262/265              | 0.92 (0.77, 1.11)        |   |
| IL-10           | 154/154                                       | 1.08 (0.87, 1.34)         | 165/165              | 0.98 (0.80, 1.21)        | 277/276              | 0.96 (0.82, 1.13)        |   |
| TNF- $\alpha$   | 145/142                                       | 1.09 (0.87, 1.36)         | 156/159              | 0.92 (0.73, 1.17)        | 265/268              | 1.03 (0.87, 1.22)        |   |
| CRP             | 154/154                                       | 1.09 (0.88, 1.35)         | 164/165              | 1.08 (0.86, 1.37)        | 278/278              | 1.03 (0.87, 1.24)        |   |
| sCD14           | 153/154                                       | 1.07 (0.84, 1.37)         | 166/165              | 1.07 (0.86, 1.33)        | 273/275              | 0.94 (0.78, 1.14)        |   |
| sGP130          | 154/155                                       | 0.89 (0.66, 1.20)         | 165/164              | 1.28 (0.96, 1.72)        | 273/275              | 0.98 (0.80, 1.19)        |   |
| sTNF-R2         | 149/155                                       | <b>1.29 (1.03, 1.61)</b>  | 166/166              | <b>1.27 (1.02, 1.59)</b> | 277/278              | <b>1.22 (1.03, 1.45)</b> | ‡ |
| sIL-6R $\alpha$ | 153/155                                       | 0.97 (0.77, 1.21)         | 164/165              | 1.20 (0.97, 1.49)        | 275/277              | 1.11 (0.94, 1.31)        |   |
| BAFF            | 152/155                                       | <b>0.79 (0.67, 0.94)</b>  | 163/166              | <b>0.73 (0.59, 0.89)</b> | 277/278              | 0.95 (0.80, 1.12)        | ‡ |
| sIL-2R $\alpha$ | 147/154                                       | <b>1.80 (1.45, 2.23)</b>  | 163/166              | <b>1.40 (1.14, 1.73)</b> | 275/278              | 1.14 (0.96, 1.35)        | ‡ |
| CXCL13          | 139/140                                       | <b>1.34 (1.10, 1.64)</b>  | 152/162              | <b>1.38 (1.13, 1.69)</b> | 263/267              | <b>1.25 (1.05, 1.48)</b> | ‡ |
| sCD30           | 150/154                                       | <b>1.60 (1.30, 1.98)</b>  | 164/166              | <b>1.61 (1.29, 2.00)</b> | 276/278              | 1.13 (0.96, 1.33)        | ‡ |

Abbreviations: NHL, non-Hodgkin lymphoma; OR, odds ratio; CI, confidence interval; SD, standard deviation; IL, interleukin; TNF, tumor necrosis factor; CRP, C-reactive protein; sCD14, soluble CD14; sGP130, soluble GP130; sTNF-R2, soluble tumor necrosis factor receptor-2; sIL-6R $\alpha$ , soluble interleukin-6 receptor- $\alpha$ ; BAFF, B-cell activating factor of the TNF family; sIL-2R $\alpha$ , soluble interleukin-2 receptor- $\alpha$ ; CXCL13, CXC chemokine ligand 13; sCD30, soluble CD30.

\* Adjusted for age at blood draw, time of day of blood draw, race, and cohort (sex).

† Odds Ratios (OR) per 1 standard deviation increase in biomarker concentration, based on batch effect-corrected values with outliers removed, for Nurses' Health Study and Health Professionals Follow-up Study cohorts combined.

‡ Statistically significant in non-stratified models (Table 2).

**Supplementary Table 8. Associations of individual plasma immune markers and risk of major histologic subtypes of NHL in the combined cohorts, stratified by years of follow-up**

| Marker                | Years from blood draw to diagnosis/index date |                           |                      |                           |                      |                           |
|-----------------------|-----------------------------------------------|---------------------------|----------------------|---------------------------|----------------------|---------------------------|
|                       | 0 to less than 5                              |                           | 5 to less than 10    |                           | 10 or more           |                           |
|                       | N cases/<br>controls                          | OR (95% CI)<br>per 1-SD*† | N cases/<br>controls | OR (95% CI)<br>per 1-SD*† | N cases/<br>controls | OR (95% CI)<br>per 1-SD*† |
| <b>B-NHL subtypes</b> |                                               |                           |                      |                           |                      |                           |
| <b>DLBCL</b>          |                                               |                           |                      |                           |                      |                           |
| IL-6                  | 26/155                                        | 1.12 (0.71, 1.78)         | 27/164               | 1.01 (0.67, 1.54)         | 61/278               | 1.17 (0.88, 1.55)         |
| IL-8                  | 26/141                                        | 0.87 (0.54, 1.40)         | 24/157               | 1.22 (0.77, 1.93)         | 56/265               | 0.89 (0.64, 1.25)         |
| IL-10                 | 26/154                                        | 1.05 (0.69, 1.61)         | 27/164               | 1.11 (0.75, 1.65)         | 60/276               | 1.22 (0.91, 1.65)         |
| TNF- $\alpha$         | 26/142                                        | 1.07 (0.69, 1.66)         | 25/158               | 0.97 (0.62, 1.51)         | 57/268               | 0.98 (0.73, 1.31)         |
| CRP                   | 26/154                                        | 1.18 (0.79, 1.78)         | 27/164               | 1.32 (0.85, 2.06)         | 61/278               | 1.03 (0.77, 1.38)         |
| sCD14                 | 26/154                                        | 1.10 (0.70, 1.73)         | 27/164               | 1.00 (0.65, 1.53)         | 61/275               | 0.80 (0.57, 1.12)         |
| sGP130                | 26/155                                        | 0.47 (0.22, 1.01)         | 27/163               | 1.03 (0.60, 1.77)         | 61/275               | 0.90 (0.62, 1.30)         |
| sTNF-R2               | 26/155                                        | 0.80 (0.51, 1.24)         | 27/165               | 1.37 (0.88, 2.14)         | 61/278               | 1.04 (0.77, 1.40)         |
| sIL-6R $\alpha$       | 26/155                                        | 0.74 (0.45, 1.21)         | 27/164               | 1.05 (0.70, 1.58)         | 61/277               | 0.87 (0.64, 1.19)         |
| BAFF                  | 26/155                                        | 0.86 (0.57, 1.28)         | 27/165               | 0.78 (0.51, 1.20)         | 61/278               | 1.20 (0.89, 1.61)         |
| sIL-2R $\alpha$       | 26/154                                        | 1.33 (0.92, 1.91)         | 27/165               | <b>1.74 (1.10, 2.76)</b>  | 61/278               | 1.12 (0.85, 1.49)         |
| CXCL13                | 25/140                                        | 0.74 (0.46, 1.18)         | 25/161               | <b>1.63 (1.14, 2.31)</b>  | 57/267               | <b>1.35 (1.01, 1.81)</b>  |
| sCD30                 | 26/154                                        | 0.96 (0.62, 1.49)         | 27/165               | <b>1.92 (1.30, 2.84)</b>  | 61/278               | 1.18 (0.90, 1.54)         |
| <b>FL</b>             |                                               |                           |                      |                           |                      |                           |
| IL-6                  | 22/155                                        | 0.71 (0.44, 1.15)         | 22/163               | 0.91 (0.58, 1.41)         | 48/278               | 0.99 (0.74, 1.33)         |
| IL-8                  | 20/141                                        | 1.23 (0.76, 2.01)         | 21/156               | 1.07 (0.66, 1.73)         | 43/265               | 1.01 (0.72, 1.41)         |
| IL-10                 | 22/154                                        | 0.68 (0.43, 1.06)         | 21/163               | 1.02 (0.65, 1.61)         | 48/276               | 1.14 (0.83, 1.57)         |
| TNF- $\alpha$         | 20/142                                        | 1.19 (0.71, 1.97)         | 22/157               | 1.32 (0.79, 2.19)         | 45/268               | 1.10 (0.80, 1.51)         |
| CRP                   | 22/154                                        | 1.02 (0.65, 1.60)         | 22/163               | 0.96 (0.58, 1.58)         | 48/278               | 1.25 (0.91, 1.73)         |
| sCD14                 | 22/154                                        | 1.15 (0.71, 1.85)         | 22/163               | 0.59 (0.34, 1.02)         | 46/275               | 1.15 (0.79, 1.65)         |
| sGP130                | 22/155                                        | 0.64 (0.31, 1.33)         | 22/162               | 1.23 (0.73, 2.10)         | 47/275               | 1.29 (0.96, 1.74)         |
| sTNF-R2               | 21/155                                        | 1.34 (0.83, 2.17)         | 22/164               | 1.25 (0.78, 2.00)         | 47/278               | <b>1.45 (1.08, 1.94)</b>  |
| sIL-6R $\alpha$       | 22/155                                        | 1.17 (0.73, 1.88)         | 22/163               | 1.06 (0.69, 1.63)         | 47/277               | 1.21 (0.90, 1.62)         |
| BAFF                  | 22/155                                        | 0.86 (0.56, 1.33)         | 22/164               | 0.96 (0.58, 1.59)         | 48/278               | 0.92 (0.66, 1.29)         |

|                                |        |                          |        |                          |        |                          |
|--------------------------------|--------|--------------------------|--------|--------------------------|--------|--------------------------|
| sIL-2R $\alpha$                | 22/154 | <b>2.29 (1.46, 3.60)</b> | 22/164 | 1.40 (0.90, 2.19)        | 47/278 | 1.30 (0.94, 1.79)        |
| CXCL13                         | 20/140 | <b>2.22 (1.41, 3.50)</b> | 22/160 | 1.22 (0.82, 1.81)        | 44/267 | <b>1.65 (1.19, 2.29)</b> |
| sCD30                          | 21/154 | <b>3.10 (1.93, 4.98)</b> | 22/164 | <b>1.75 (1.15, 2.67)</b> | 47/278 | 1.32 (0.98, 1.76)        |
| <b>CLL/SLL</b>                 |        |                          |        |                          |        |                          |
| IL-6                           | 41/155 | 1.20 (0.86, 1.66)        | 47/163 | 0.89 (0.64, 1.23)        | 77/278 | 0.98 (0.76, 1.27)        |
| IL-8                           | 38/141 | 1.37 (0.91, 2.06)        | 45/156 | 1.17 (0.80, 1.70)        | 73/265 | 0.75 (0.56, 1.01)        |
| IL-10                          | 41/154 | 1.07 (0.75, 1.51)        | 47/163 | 0.87 (0.63, 1.19)        | 77/276 | <b>0.75 (0.58, 0.96)</b> |
| TNF- $\alpha$                  | 40/142 | 1.17 (0.83, 1.65)        | 45/157 | 0.96 (0.67, 1.37)        | 73/268 | 1.04 (0.80, 1.35)        |
| CRP                            | 41/154 | 1.05 (0.76, 1.45)        | 47/163 | 0.85 (0.59, 1.24)        | 77/278 | 0.89 (0.67, 1.18)        |
| sCD14                          | 41/154 | 1.03 (0.71, 1.52)        | 47/163 | 1.18 (0.84, 1.66)        | 76/275 | <b>0.69 (0.50, 0.94)</b> |
| sGP130                         | 41/155 | 0.91 (0.55, 1.51)        | 47/162 | <b>1.57 (1.05, 2.36)</b> | 75/275 | 0.78 (0.54, 1.12)        |
| sTNF-R2                        | 40/155 | <b>1.66 (1.16, 2.38)</b> | 47/164 | <b>1.44 (1.04, 2.00)</b> | 77/278 | 1.06 (0.82, 1.36)        |
| sIL-6R $\alpha$                | 41/155 | 0.97 (0.68, 1.40)        | 47/163 | <b>1.38 (1.01, 1.89)</b> | 77/277 | 1.11 (0.87, 1.42)        |
| BAFF                           | 39/155 | <b>0.36 (0.24, 0.53)</b> | 47/164 | <b>0.47 (0.32, 0.68)</b> | 77/278 | <b>0.70 (0.52, 0.93)</b> |
| sIL-2R $\alpha$                | 39/154 | <b>2.79 (1.90, 4.09)</b> | 46/164 | <b>1.50 (1.09, 2.07)</b> | 77/278 | 1.05 (0.80, 1.38)        |
| CXCL13                         | 38/140 | <b>1.35 (1.00, 1.81)</b> | 45/160 | 0.99 (0.72, 1.37)        | 73/267 | 1.02 (0.78, 1.34)        |
| sCD30                          | 40/154 | <b>2.36 (1.59, 3.51)</b> | 46/164 | <b>1.51 (1.11, 2.04)</b> | 77/278 | 0.96 (0.74, 1.24)        |
| <b>Other B-NHL<sup>‡</sup></b> |        |                          |        |                          |        |                          |
| IL-6                           | 38/155 | 1.00 (0.69, 1.45)        | 37/163 | 0.76 (0.55, 1.06)        | 56/278 | 0.95 (0.71, 1.27)        |
| IL-8                           | 33/141 | 1.01 (0.68, 1.51)        | 33/156 | 1.13 (0.76, 1.68)        | 54/265 | 1.15 (0.85, 1.56)        |
| IL-10                          | 38/154 | 1.22 (0.87, 1.71)        | 38/163 | 1.05 (0.75, 1.47)        | 56/276 | 0.89 (0.66, 1.20)        |
| TNF- $\alpha$                  | 33/142 | 0.98 (0.68, 1.39)        | 33/157 | <b>0.62 (0.42, 0.92)</b> | 54/268 | 0.86 (0.64, 1.16)        |
| CRP                            | 38/154 | 1.22 (0.86, 1.74)        | 36/163 | 1.14 (0.76, 1.71)        | 56/278 | 1.15 (0.85, 1.57)        |
| sCD14                          | 37/154 | 1.13 (0.77, 1.68)        | 38/163 | 1.30 (0.93, 1.81)        | 55/275 | 1.00 (0.70, 1.41)        |
| sGP130                         | 38/155 | 1.18 (0.76, 1.81)        | 37/162 | 1.10 (0.71, 1.71)        | 55/275 | 0.87 (0.60, 1.28)        |
| sTNF-R2                        | 35/155 | <b>1.54 (1.09, 2.17)</b> | 38/164 | <b>1.42 (1.01, 1.99)</b> | 56/278 | 1.20 (0.90, 1.59)        |
| sIL-6R $\alpha$                | 37/155 | 1.11 (0.76, 1.64)        | 36/163 | 1.07 (0.75, 1.52)        | 55/277 | 1.18 (0.89, 1.56)        |
| BAFF                           | 38/155 | 0.85 (0.64, 1.12)        | 35/164 | 0.89 (0.65, 1.24)        | 55/278 | 0.95 (0.69, 1.29)        |
| sIL-2R $\alpha$                | 34/154 | <b>1.71 (1.23, 2.38)</b> | 36/164 | <b>1.47 (1.01, 2.12)</b> | 56/278 | 1.19 (0.89, 1.60)        |
| CXCL13                         | 33/140 | <b>1.75 (1.25, 2.44)</b> | 29/160 | <b>1.41 (1.03, 1.94)</b> | 54/267 | 1.31 (0.98, 1.76)        |
| sCD30                          | 38/154 | <b>1.40 (1.05, 1.87)</b> | 37/164 | <b>1.55 (1.10, 2.19)</b> | 56/278 | 1.05 (0.79, 1.40)        |

#### All T-NHL

|                 |        |                          |        |                   |       |                   |
|-----------------|--------|--------------------------|--------|-------------------|-------|-------------------|
| IL-6            | 13/155 | 0.98 (0.53, 1.79)        | 10/163 | 1.30 (0.67, 2.53) | 7/278 | 1.13 (0.53, 2.39) |
| IL-8            | 12/141 | 0.70 (0.36, 1.35)        | 10/156 | 1.18 (0.59, 2.36) | 7/265 | 0.66 (0.27, 1.65) |
| IL-10           | 13/154 | 1.30 (0.73, 2.33)        | 10/163 | 0.76 (0.42, 1.39) | 7/276 | 2.21 (0.90, 5.45) |
| TNF- $\alpha$   | 12/142 | 0.93 (0.52, 1.64)        | 10/157 | 1.18 (0.58, 2.41) | 7/268 | 1.56 (0.70, 3.46) |
| CRP             | 13/154 | 0.83 (0.48, 1.45)        | 10/163 | 2.05 (0.99, 4.28) | 7/278 | 0.54 (0.22, 1.29) |
| sCD14           | 13/154 | 1.01 (0.54, 1.89)        | 10/163 | 0.86 (0.43, 1.73) | 7/275 | 0.93 (0.38, 2.29) |
| sGP130          | 13/155 | 0.98 (0.46, 2.09)        | 10/162 | 0.86 (0.33, 2.23) | 7/275 | 0.59 (0.19, 1.84) |
| sTNF-R2         | 13/155 | 1.13 (0.63, 2.01)        | 10/164 | 0.85 (0.41, 1.76) | 7/278 | 1.01 (0.47, 2.17) |
| sIL-6R $\alpha$ | 13/155 | 0.72 (0.37, 1.37)        | 10/163 | 1.17 (0.65, 2.13) | 7/277 | 1.26 (0.65, 2.43) |
| BAFF            | 13/155 | 1.38 (0.86, 2.22)        | 10/164 | 0.74 (0.34, 1.60) | 7/278 | 1.63 (0.70, 3.81) |
| sIL-2R $\alpha$ | 13/154 | <b>2.26 (1.31, 3.89)</b> | 10/164 | 1.91 (0.93, 3.92) | 7/278 | 1.30 (0.59, 2.85) |
| CXCL13          | 11/140 | 1.23 (0.66, 2.29)        | 10/160 | 1.40 (0.85, 2.30) | 7/267 | 0.72 (0.30, 1.70) |
| sCD30           | 12/154 | <b>1.74 (1.01, 2.97)</b> | 10/164 | 1.33 (0.72, 2.45) | 7/278 | 1.49 (0.75, 2.95) |

Abbreviations: NHL, non-Hodgkin lymphoma; OR, odds ratio; CI, confidence interval; SD, standard deviation; B-NHL, B-cell NHL; DLBCL, diffuse large B-cell lymphoma; FL, follicular lymphoma; CLL/SLL, chronic lymphocytic leukemia/small lymphocytic lymphoma; and T-NHL, T-cell NHL; IL, interleukin; TNF, tumor necrosis factor; CRP, C-reactive protein; sCD14, soluble CD14; sGP130, soluble GP130; sTNF-R2, soluble tumor necrosis factor receptor-2; sIL-6R $\alpha$ , soluble interleukin-6 receptor- $\alpha$ ; BAFF, B-cell activating factor of the TNF family; sIL-2R $\alpha$ , soluble interleukin-2 receptor- $\alpha$ ; CXCL13, CXC chemokine ligand 13; sCD30, soluble CD30.

\* Adjusted for age at blood draw, time of day of blood draw, and cohort (sex).

† Odds Ratios (OR) per 1 standard deviation increase in biomarker concentration, based on batch effect-corrected values with outliers removed, for Nurses' Health Study and Health Professionals Follow-up Study cohorts combined.

‡ Other B-cell subtypes include Burkitt lymphoma (N=4), lymphoplasmacytic lymphoma (N=19), mantle cell lymphoma (N=20), marginal zone lymphoma (N=44), other B-NHL (N=20), and unclassified B-NHL (N=25).
